# Supplementary material for: H3K27ac nucleosomes facilitate HMGN localization at regulatory sites to modulate chromatin binding of transcription factors
Source: PubMed Central journal article supplement (PMC8866397; doi:10.1038/s42003-022-03099-0), 2022-02-23
Supplement: 42003_2022_3099_MOESM2_ESM.pdf [file 42003_2022_3099_MOESM2_ESM.pdf]

## Description of Additional Supplementary Files

**File name:** Supplementary Data 1

**Description:** Source data for Figures 2G, Supplementary Figures 6a,b,c.
